# Supplementary material for: Cardinality as a highly descriptive feature in myoelectric pattern recognition for decoding motor volition
Source: Front Neurosci. 2015 Oct 29;9:416. doi: 10.3389/fnins.2015.00416 (PMC4625080; doi:10.3389/fnins.2015.00416)
Supplement: Supplementary file 1 [file Table1.XLSX]

## Sheet: Sheet1
	Single - 10 mov - cTp 0.7												Single - 10 mov - cTp 0.7												LDA - Statistical signifcance												MLP - Statistical signifcance
	Mean	slpch	zc	mabs	wl	rms	mfl	dam	std	ren	card		mean ±std %	slpch	zc	mabs	wl	rms	mfl	dam	std	ren	card			slpch	zc	mabs	wl	rms	mfl	dam	std	ren	card			slpch	zc	mabs	wl	rms	mfl	dam	std	ren	card
	LDA	74.6494	77.9147	80.2468	81.9917	81.7894	82.1429	82.2347	84.1011	85.269	89.128		LDA	74.6 ±8.5	77.9 ±8.5	80.2 ±8.3	82.0 ±7.5	81.8 ±8.2	82.1 ±7.5	82.2 ±7.5	84.1 ±7.0	85.3 ±8.0	89.1 ±6.0		slpch	0	0.00318514	0.0064246	0.00101883	0.00169589	0.000891803	0.000891803	0.000120422	0.00021908	8.84492e-05		slpch	0	0.100458	0.116888	0.0569146	0.0333402	0.0619528	0.0365613	0.000891803	0.000120422	0.000103346
	MLP	50.9137	54.0111	57.2449	57.5334	58.6391	57.4889	58.5288	62.6531	66.205	73.6753		MLP	50.9 ±19.3	54.0 ±17.9	57.2 ±24.1	57.5 ±23.8	58.6 ±23.9	57.5 ±24.4	58.5 ±23.6	62.7 ±21.7	66.2 ±18.9	73.7 ±15.5		zc	0	0	0.295878	0.011129	0.0137413	0.0099899	0.0064246	0.000162856	0.000449337	8.84492e-05		zc	0	0	0.97022	0.422135	0.295878	0.681322	0.350656	0.0064246	0.000390231	8.85746e-05
																									mabs	0	0	0	0.00945709	0.0051516	0.00759601	0.00359182	0.000103346	0.00021908	8.85746e-05		mabs	0	0	0	0.97022	0.167184	0.896032	0.278923	0.000777943	0.00194253	8.85746e-05
	STD	±											%	card - max(H. set)			%	card - max(others)							wl	0	0	0	0	0.765198	0.30446	0.411424	0.0168809	0.00220394	8.85746e-05		wl	0	0	0	0	0.322424	0.708881	0.239521	0.000162856	0.00132454	8.84492e-05
	LDA	8.45723	8.45919	8.27236	7.49576	8.20595	7.4758	7.49718	6.95609	8.02042	5.98292		LDA	7.13636			LDA	3.859							rms	0	0	0	0	0	0.627446	0.411465	0.000120422	0.00718917	8.85746e-05		rms	0	0	0	0	0	0.370261	0.910825	0.000449337	0.00171302	8.85746e-05
	MLP	19.3179	17.8553	24.1148	23.7949	23.928	24.4087	23.5507	21.698	18.8911	15.4783		MLP	16.1419			MLP	7.47032							mfl	0	0	0	0	0	0	0.808185	0.0438037	0.00359182	8.85746e-05		mfl	0	0	0	0	0	0	0.247062	0.000390231	0.000779593	8.85746e-05
																									dam	0	0	0	0	0	0	0	0.036545	0.00404199	8.85746e-05		dam	0	0	0	0	0	0	0	0.000516133	0.00282086	8.85746e-05
																									std	0	0	0	0	0	0	0	0	0.262722	8.85746e-05		std	0	0	0	0	0	0	0	0	0.0793217	8.85746e-05
																									ren	0	0	0	0	0	0	0	0	0	8.85746e-05		ren	0	0	0	0	0	0	0	0	0	8.85746e-05
	Single - 6 mov - cTp 0.7												Single - 6 mov - cTp 0.7												LDA - Statistical signifcance												MLP - Statistical significance
	Mean	slpch	zc	mabs	wl	rms	mfl	dam	std	ren	card		mean ±std %	slpch	zc	mabs	wl	rms	mfl	dam	std	ren	card			slpch	zc	mabs	wl	rms	mfl	dam	std	ren	card			slpch	zc	mabs	wl	rms	mfl	dam	std	ren	card
	LDA	84.0933	88.7041	90.3192	91.9898	91.312	91.9213	92.1152	93.1516	94.8776	96.3426		LDA	84.1 ±7.6	88.7 ±5.4	90.3 ±4.8	92.0 ±3.9	91.3 ±4.1	91.9 ±4.0	92.1 ±3.9	93.2 ±3.2	94.9 ±3.3	96.3 ±2.2		slpch	0	0.00131939	0.00282086	0.000293162	0.00101883	0.000390231	0.000292804	0.000103346	0.000103346	8.85746e-05		slpch	0	0.000390231	0.00150729	0.00101779	0.000516715	0.000293162	0.00150729	0.000253595	8.85746e-05	8.85746e-05
	MLP	73.9869	81.7143	87.3251	88.4781	88.6516	88.5583	88.0743	91.1297	90.3557	95.1093		MLP	74.0 ±14.1	81.7 ±9.4	87.3 ±9.2	88.5 ±9.3	88.7 ±9.3	88.6 ±8.9	88.1 ±8.9	91.1 ±7.1	90.4 ±7.0	95.1 ±3.9		zc	0	0	0.197715	0.00359182	0.0196222	0.00454993	0.00141047	0.000592762	8.85746e-05	0.000103346		zc	0	0	0.0438037	0.0064246	0.011129	0.00803443	0.0137413	0.0019443	0.000779593	8.85746e-05
																									mabs	0	0	0	0.00171302	0.00403558	0.00510719	0.00101779	0.000120258	8.84492e-05	8.85746e-05		mabs	0	0	0	0.887979	0.0859239	0.340979	0.575486	0.0019443	0.278965	8.84492e-05
	STD	±											%	card - max(H. set)			%	card - max(others)							wl	0	0	0	0	0.161448	0.601149	0.489707	0.00265108	0.000448305	8.84492e-05		wl	0	0	0	0	0.985101	0.765198	0.779444	0.00220197	0.519614	0.000182182
	LDA	7.56448	5.35275	4.7963	3.92218	4.0677	3.97954	3.85769	3.19155	3.34543	2.15061		LDA	4.35277			LDA	1.46501							rms	0	0	0	0	0	0.443883	0.161411	0.000139946	8.84492e-05	8.84492e-05		rms	0	0	0	0	0	0.285979	0.455194	0.00454289	0.350656	0.000140134
	MLP	14.0928	9.44372	9.22887	9.28291	9.32291	8.91417	8.94344	7.11498	6.95057	3.94607		MLP	6.6312			MLP	3.97959							mfl	0	0	0	0	0	0	0.350363	0.00402918	0.000272036	8.85746e-05		mfl	0	0	0	0	0	0	0.779463	0.0099899	0.478087	0.00068061
																									dam	0	0	0	0	0	0	0	0.00194076	0.00068061	8.83239e-05		dam	0	0	0	0	0	0	0	0.00249501	0.331723	0.000189012
																									std	0	0	0	0	0	0	0	0	0.00181219	8.83239e-05		std	0	0	0	0	0	0	0	0	0.108396	0.00170983
																									ren	0	0	0	0	0	0	0	0	0	0.000250216		ren	0	0	0	0	0	0	0	0	0	8.84492e-05
	Single - 10 mov - cTp 0.4												Single - 10 mov - cTp 0.4												LDA - Statistical signifcance												MLP - Statistical signifcance
	Mean	slpch	zc	mabs	wl	rms	mfl	dam	std	ren	card		mean ±std %	slpch	zc	mabs	wl	rms	mfl	dam	std	ren	card			slpch	zc	mabs	wl	rms	mfl	dam	std	ren	card			slpch	zc	mabs	wl	rms	mfl	dam	std	ren	card
	LDA	79.6006	81.9205	86.6591	87.3929	87.7029	87.349	87.3393	89.5276	89.2906	93.4724		LDA	79.6 ±7.2	81.9 ±7.6	86.7 ±7.1	87.4 ±7.1	87.7 ±6.5	87.3 ±7.3	87.3 ±7.2	89.5 ±5.7	89.3 ±7.2	93.5 ±4.4		slpch	0	0.052222	0.00220001	0.00220394	0.000448821	0.00249284	0.00249501	8.85746e-05	0.000389774	8.85746e-05		slpch	0	0.232226	0.525653	0.370261	0.22497	0.295878	0.331723	0.0123742	0.00021908	0.000103346
	MLP	45.0601	47.849	47.1364	48.5455	49.4221	48.4383	48.8231	53.2013	60.4578	66.6412		MLP	45.1 ±20.0	47.8 ±17.8	47.1 ±29.3	48.5 ±29.4	49.4 ±28.1	48.4 ±29.1	48.8 ±29.2	53.2 ±26.2	60.5 ±22.0	66.6 ±19.4		zc	0	0	0.0064246	0.00573399	0.000390231	0.00718917	0.00511105	8.84492e-05	0.00108735	8.85746e-05		zc	0	0	0.736875	0.955339	0.765198	0.940481	0.910825	0.167184	0.000449337	0.000103346
																									mabs	0	0	0	0.411424	0.23948	0.478125	0.627386	0.000552596	0.013034	8.85746e-05		mabs	0	0	0	0.217957	0.147416	0.350656	0.172958	0.00141183	0.000338455	8.85746e-05
	STD	±											%	card - max(H. set)			%	card - max(others)							wl	0	0	0	0	0.935846	0.895978	0.586831	0.0333249	0.0859239	8.81987e-05		wl	0	0	0	0	0.614237	0.722821	0.97022	0.00999639	0.000593417	0.000120422
	LDA	7.20363	7.57907	7.05234	7.13863	6.53005	7.3114	7.22169	5.73677	7.23628	4.39273		LDA	6.07955			LDA	3.94481							rms	0	0	0	0	0	0.866574	0.722821	0.00025328	0.171195	0.000103203		rms	0	0	0	0	0	0.262722	0.940476	0.00573399	0.000593417	8.84492e-05
	MLP	19.9778	17.7894	29.2524	29.4345	28.1398	29.1088	29.1774	26.1949	22.0292	19.3988		MLP	18.0958			MLP	6.18344							mfl	0	0	0	0	0	0	0.985094	0.0333249	0.0929347	8.85746e-05		mfl	0	0	0	0	0	0	0.550292	0.00132454	0.000390231	8.85746e-05
																									dam	0	0	0	0	0	0	0	0.0400438	0.0858965	8.85746e-05		dam	0	0	0	0	0	0	0	0.0289511	0.00068061	0.00012975
																									std	0	0	0	0	0	0	0	0	0.793839	0.000139946		std	0	0	0	0	0	0	0	0	0.00282086	0.000139946
																									ren	0	0	0	0	0	0	0	0	0	0.000103346		ren	0	0	0	0	0	0	0	0	0	0.000162427
	Sets - 10 mov - cTp 0.7								Sets - 10 mov - cTp 0.7								LDA - Statistical signifcance								MLP - Statistical significance
	Mean	H. set	* slpch	* zc	* mabs	* wl	+ card		mean ±std %	H. set	* slpch	* zc	* mabs	* wl	+ card			H. set	* slpch	* zc	* mabs	* wl	+ card			H. set	* slpch	* zc	* mabs	* wl	+ card
	LDA	92.2078	92.7644	92.9249	92.9119	92.9972	93.7282		LDA	92.2 ±7.6	92.8 ±5.4	92.9 ±4.8	92.9 ±3.9	93.0 ±4.1	93.7 ±4.0		H. set	0	0.0544841	0.00945709	0.00193722	0.00068061	0.000131627		H. set	0	0.0478187	0.0175828	0.000103346	0.000337242	0.000480286
	MLP	91.5019	92.3312	92.2811	93.2078	92.9184	92.8766		MLP	91.5 ±14.1	92.3 ±9.4	92.3 ±9.2	93.2 ±9.3	92.9 ±9.3	92.9 ±8.9		* slpch	0	0	0.0792955	0.588122	0.341021	0.000291736		* slpch	0	0	0.654131	0.00222059	0.00220394	0.0892482
																	* zc	0	0	0	0.985105	0.837287	0.000389317		* zc	0	0	0	0.00380627	0.0157555	0.045774
	STD	±							%	H. set - max(others)							* mabs	0	0	0	0	0.588219	0.000139946		* mabs	0	0	0	0	0.13044	0.0670445
	LDA	7.56448	5.35275	4.7963	3.92218	4.0677	3.97954		LDA	-1.52041							* wl	0	0	0	0	0	0.000120258		* wl	0	0	0	0	0	0.824764
	MLP	14.0928	9.44372	9.22887	9.28291	9.32291	8.91417		MLP	-1.70594
	Sets - 6 mov - cTp 0.7								Sets - 6 mov - cTp 0.7								LDA - Statistical signifcance								MLP - Statistical significance
	Mean	H. set	* slpch	* zc	* mabs	* wl	+ card		mean ±std %	H. set	* slpch	* zc	* mabs	* wl	+ card			H. set	* slpch	* zc	* mabs	* wl	+ card			H. set	* slpch	* zc	* mabs	* wl	+ card
	LDA	97.8717	98.1618	97.9198	97.9125	98.207	98.309		LDA	97.9 ±1.1	98.2 ±1.1	97.9 ±1.3	97.9 ±1.2	98.2 ±1.1	98.3 ±1.0		H. set	0	0.0222154	0.935774	0.672566	0.0484198	0.00203061		H. set	0	0.17292	0.985105	0.00688481	0.047741	0.0498602
	MLP	97.6108	97.8717	97.5641	98.0146	97.8834	97.8688		MLP	97.6 ±1.5	97.9 ±1.3	97.6 ±1.8	98.0 ±1.2	97.9 ±1.4	97.9 ±1.3		* slpch	0	0	0.0276351	0.13626	0.887968	0.136101		* slpch	0	0	0.234791	0.170935	0.743803	0.951837
																	* zc	0	0	0	0.702095	0.0278015	0.00656782		* zc	0	0	0	0.0166032	0.107395	0.0893823
	STD	±							%	H. set - max(others)							* mabs	0	0	0	0	0.0852408	0.00136857		* mabs	0	0	0	0	0.141352	0.0880369
	LDA	1.11321	1.06871	1.30004	1.15727	1.10071	0.984147		LDA	-0.437318							* wl	0	0	0	0	0	0.359968		* wl	0	0	0	0	0	0.777783
	MLP	1.52153	1.3196	1.81856	1.21543	1.43602	1.34382		MLP	-0.40379
	Sets - 10 mov - cTp 0.4								Sets - 10 mov - cTp 0.4								LDA - Statistical signifcance								MLP - Statistical significance
	Mean	H. set	* slpch	* zc	* mabs	* wl	+ card		mean ±std %	H. set	* slpch	* zc	* mabs	* wl	+ card			H. set	* slpch	* zc	* mabs	* wl	+ card			H. set	* slpch	* zc	* mabs	* wl	+ card
	LDA	95.3409	96.0812	96.2922	95.8295	96.0455	96.6737		LDA	95.3 ±3.3	96.1 ±2.8	96.3 ±2.6	95.8 ±2.8	96.0 ±2.8	96.7 ±2.5		H. set	0	0.00233503	0.00428076	0.0238454	0.00379406	0.00029215		H. set	0	0.0289511	0.0542737	0.000154381	0.00147062	0.00044676
	MLP	94.0406	94.7419	94.5325	95.3133	95.164	95.4318		MLP	94.0 ±4.3	94.7 ±3.9	94.5 ±4.2	95.3 ±3.6	95.2 ±3.7	95.4 ±3.5		* slpch	0	0	0.152621	0.304662	0.779294	0.00218827		* slpch	0	0	0.575453	0.04992	0.0858146	0.0028907
																	* zc	0	0	0	0.0639877	0.224687	0.121179		* zc	0	0	0	0.00802894	0.011115	0.00539829
	STD	±							%	H. set - max(others)			Improvement cTp from 0.4 to 0.7				* mabs	0	0	0	0	0.0927223	0.00116864		* mabs	0	0	0	0	0.304375	0.477934
	LDA	3.33508	2.79807	2.62267	2.79428	2.82078	2.45005		LDA	-1.33279			LDA	2.9455	3.12144		* wl	0	0	0	0	0	0.00495932		* wl	0	0	0	0	0	0.0205562
	MLP	4.28228	3.92685	4.18702	3.6479	3.68424	3.53488		MLP	-1.39123			MLP	2.55519	2.35119
	Single - 10 mov - cTp 0.7 - Time Windows - LDA							Single - 10 mov - cTp 0.7 - Time Windows - LDA							LDA - 300 ms - Statistical signifcance							LDA - 250 ms - Statistical signifcance							LDA - 200 ms - Statistical signifcance							LDA - 150 ms - Statistical signifcance							LDA - 100 ms - Statistical signifcance
	Mean	slpch	zc	mabs	wl	card		mean ±std %	slpch	zc	mabs	wl	card			slpch	zc	mabs	wl	card			slpch	zc	mabs	wl	card			slpch	zc	mabs	wl	card			slpch	zc	mabs	wl	card			slpch	zc	mabs	wl	card
	300 ms	80.1169	82.397	82.5195	84.9879	89.8905		300 ms	80.1 ±6.6	82.4 ±7.3	82.5 ±7.8	85.0 ±6.5	89.9 ±5.7		slpch	0	0.0333402	0.197715	0.00220394	8.85746e-05		slpch	0	0.00802894	0.0859239	0.00318514	8.85746e-05		slpch	0	0.00318514	0.0064246	0.00101883	8.84492e-05		slpch	0	0.0019443	0.00116243	0.000293162	8.85746e-05		slpch	0	0.00249501	0.000162856	0.000120422	8.85746e-05
	250 ms	77.642	80.392	80.9735	83.2159	89.518		250 ms	77.6 ±7.7	80.4 ±7.8	81.0 ±8.5	83.2 ±7.3	89.5 ±5.6		zc	0	0	0.793821	0.0303651	8.85746e-05		zc	0	0	1	0.0619528	8.85746e-05		zc	0	0	0.295878	0.011129	8.84492e-05		zc	0	0	0.00573399	0.000390231	8.85746e-05		zc	0	0	0.000162427	0.000140134	8.85746e-05
	200 ms	74.6494	77.9147	80.2468	81.9917	89.128		200 ms	74.6 ±8.5	77.9 ±8.5	80.2 ±8.3	82.0 ±7.5	89.1 ±6.0		mabs	0	0	0	0.00317985	8.85746e-05		mabs	0	0	0	0.00718413	8.85746e-05		mabs	0	0	0	0.00945709	8.85746e-05		mabs	0	0	0	0.011129	8.85746e-05		mabs	0	0	0	0.00759601	0.000103346
	150 ms	70.7482	73.9927	79.0118	80.7564	87.9618		150 ms	70.7 ±9.5	74.0 ±9.4	79.0 ±8.9	80.8 ±8.0	88.0 ±6.6		wl	0	0	0	0	8.84492e-05		wl	0	0	0	0	8.85746e-05		wl	0	0	0	0	8.85746e-05		wl	0	0	0	0	8.85746e-05		wl	0	0	0	0	8.85746e-05
	100 ms	64.68	68.1818	76.6373	78.5391	86.1645		100 ms	64.7 ±11.2	68.2 ±11.0	76.6 ±9.8	78.5 ±9.0	86.2 ±7.6
	STD	±						%	card - max(others)
	300 ms	6.57697	7.2685	7.7541	6.49422	5.6831		300 ms	4.9026
	250 ms	7.65462	7.80333	8.49328	7.33239	5.62887		250 ms	6.30208
	200 ms	8.45723	8.45919	8.27236	7.49576	5.98292		200 ms	7.13636
	150 ms	9.49612	9.43604	8.92151	7.99634	6.57815		150 ms	7.20545
	100 ms	11.1503	10.9916	9.80264	8.97724	7.58278		100 ms	7.62545
	Single - 10 mov - cTp 0.7 - Sampling frquency - LDA							Single - 10 mov - cTp 0.7 - Sampling frquency - LDA							LDA - 2k Hz - Statistical signifcance							LDA - 1k Hz - Statistical signifcance							LDA - 500 Hz - Statistical signifcance
	Mean	slpch	zc	mabs	wl	card		mean ±std %	slpch	zc	mabs	wl	card			slpch	zc	mabs	wl	card			slpch	zc	mabs	wl	card			slpch	zc	mabs	wl	card
	2k Hz	74.6494	77.9147	80.2468	81.9917	89.128		2k Hz	74.6 ±8.5	77.9 ±8.5	80.2 ±8.3	82.0 ±7.5	89.1 ±6.0		slpch	0	0.00318514	0.0064246	0.00101883	8.84492e-05		slpch	0	8.85746e-05	8.85746e-05	8.85746e-05	8.84492e-05		slpch	0	8.85746e-05	8.85746e-05	8.85746e-05	8.85746e-05
	1 k Hz	51.8117	68.2514	79.8052	82.731	88.9276		1 k Hz	51.8 ±11.8	68.3 ±10.3	79.8 ±8.8	82.7 ±7.3	88.9 ±6.0		zc	0	0	0.295878	0.011129	8.84492e-05		zc	0	0	8.85746e-05	8.85746e-05	8.85746e-05		zc	0	0	8.85746e-05	8.85746e-05	8.85746e-05
	500 Hz	22.4499	48.0937	77.6512	81.4685	85.0083		500 Hz	22.4 ±10.3	48.1 ±13.0	77.7 ±9.3	81.5 ±8.1	85.0 ±7.8		mabs	0	0	0	0.00945709	8.85746e-05		mabs	0	0	0	0.00265108	8.85746e-05		mabs	0	0	0	0.00021908	0.000189012
															wl	0	0	0	0	8.85746e-05		wl	0	0	0	0	8.85746e-05		wl	0	0	0	0	0.000448821
	STD	±						%	card - max(others)
	2k Hz	8.45723	8.45919	8.27236	7.49576	5.98292		2k Hz	7.13636				0.200371
	1 k Hz	11.7995	10.3229	8.78879	7.34942	6.03906		1 k Hz	6.19666				4.11967		LDA - Slpch - Statistical signifcance					LDA - ZC - Statistical signifcance					LDA - mabs - Statistical signifcance					LDA - wl - Statistical signifcance					LDA - card - Statistical signifcance
	500 Hz	10.3344	13.0158	9.25627	8.12944	7.83698		500 Hz	3.53989							2K	1k	500			2K	1k	500			2K	1k	500			2K	1k	500			2K	1k	500
															2K	0	8.85746e-05	8.85746e-05		2K	0	8.83239e-05	8.85746e-05		2K	0	0.125826	0.000292804		2K	0	0.052222	0.433048		2K	0	0.765159	8.84492e-05
															1k	0	0	8.85746e-05		1k	0	0	8.85746e-05		1k	0	0	0.000103346		1k	0	0	0.00206666		1k	0	0	8.84492e-05
	Single - 27 mov (Sim) - cTp 0.7 - Resolution - LDA							Single - 27 mov (Sim) - cTp 0.7 - Resolution - LDA							LDA - 16 bits - Statistical signifcance							LDA - 14 bits - Statistical signifcance							LDA - 12 bits - Statistical signifcance							LDA - 10 bits - Statistical signifcance
	Mean	slpch	zc	mabs	wl	card		mean ±std %	slpch	zc	mabs	wl	card			slpch	zc	mabs	wl	card			slpch	zc	mabs	wl	card			slpch	zc	mabs	wl	card			slpch	zc	mabs	wl	card
	16 bits	76.2109	76.6106	82.0728	83.8971	84.5031		16 bits	76.2 ±7.6	76.6 ±8.1	82.1 ±4.7	83.9 ±4.9	84.5 ±5.9		slpch	0	0.962238	0.0147723	0.00418387	0.000351533		slpch	0	0.012946	0.00226334	0.000712627	0.000293053		slpch	0	0.000293053	0.000351533	0.000293053	0.000293053		slpch	0	0.000293053	0.000293053	0.000293053	0.000293053
	14 bits	74.3671	76.5515	82.3432	83.8718	91.2494		14 bits	74.4 ±8.2	76.6 ±8.3	82.3 ±4.6	83.9 ±4.9	91.2 ±4.1		zc	0	0	0.00748178	0.000712627	0.000293053		zc	0	0	0.00648997	0.00193099	0.000293053		zc	0	0	0.00648997	0.00193099	0.000292478		zc	0	0	0.000420791	0.000351533	0.000292478
	12 bits	66.9797	76.7783	82.2951	83.6735	89.7946		12 bits	67.0 ±9.2	76.8 ±8.2	82.3 ±4.7	83.7 ±4.9	89.8 ±4.1		mabs	0	0	0	0.00226334	0.123929		mabs	0	0	0	0.012946	0.000293053		mabs	0	0	0	0.00139675	0.000293053		mabs	0	0	0	0.000843013	0.000351533
	10 bits	50.4993	73.6383	82.0666	83.673	86.2087		10 bits	50.5 ±10.8	73.6 ±8.9	82.1 ±4.7	83.7 ±4.7	86.2 ±4.4		wl	0	0	0	0	0.619154		wl	0	0	0	0	0.000293053		wl	0	0	0	0	0.000293053		wl	0	0	0	0	0.00748178
	STD	±						%	card - max(others)						LDA - Slpch - Statistical signifcance						LDA - ZC - Statistical signifcance						LDA - mabs - Statistical signifcance						LDA - WL - Statistical signifcance						LDA - card - statistical signifcance
	16 bits	7.59995	8.06164	4.66013	4.85708	5.8601		16 bits	0.60602							16 bits	14 bits	12 bits	10 bits			16 bits	14 bits	12 bits	10 bits			16 bits	14 bits	12 bits	10 bits			16 bits	14 bits	12 bits	10 bits			16 bits	14 bits	12 bits	10 bits
	14 bits	8.2355	8.3073	4.63233	4.86917	4.10705		14 bits	7.37762						16 bits	0	0.000293053	0.000293053	0.000293053		16 bits	0	0.602512	0.0581825	0.000293053		16 bits	0	0.0720029	0.381163	0.569942		16 bits	0	0.981114	0.246071	0.209675		16 bits	0	0.000293053	0.000293053	0.123929
	12 bits	9.18382	8.24435	4.65802	4.9432	4.05092		12 bits	6.12112						14 bits	0	0	0.000293053	0.000293053		14 bits	0	0	0.0552134	0.000293053		14 bits	0	0	0.849796	0.0876703		14 bits	0	0	0.209675	0.355959		14 bits	0	0	0.00050263	0.000293053
	10 bits	10.7727	8.93269	4.72966	4.66792	4.42262		10 bits	2.53568						12 bits	0	0	0	0.000293053		12 bits	0	0	0	0.000292478		12 bits	0	0	0	0.3941		12 bits	0	0	0	0.687367		12 bits	0	0	0	0.000293053
